# Supplementary material for: Identification and Functional Assessment of the First Placental Adhesin of Treponema pallidum That May Play Critical Role in Congenital Syphilis
Source: PubMed Central journal article supplement (PMC7779807; doi:10.3389/fmicb.2020.621654), 2020-12-21
Supplement: Image_1.pdf [file Image_1.pdf]

**A**

### TMHMM Posterior probabilities of Tp0954 protein

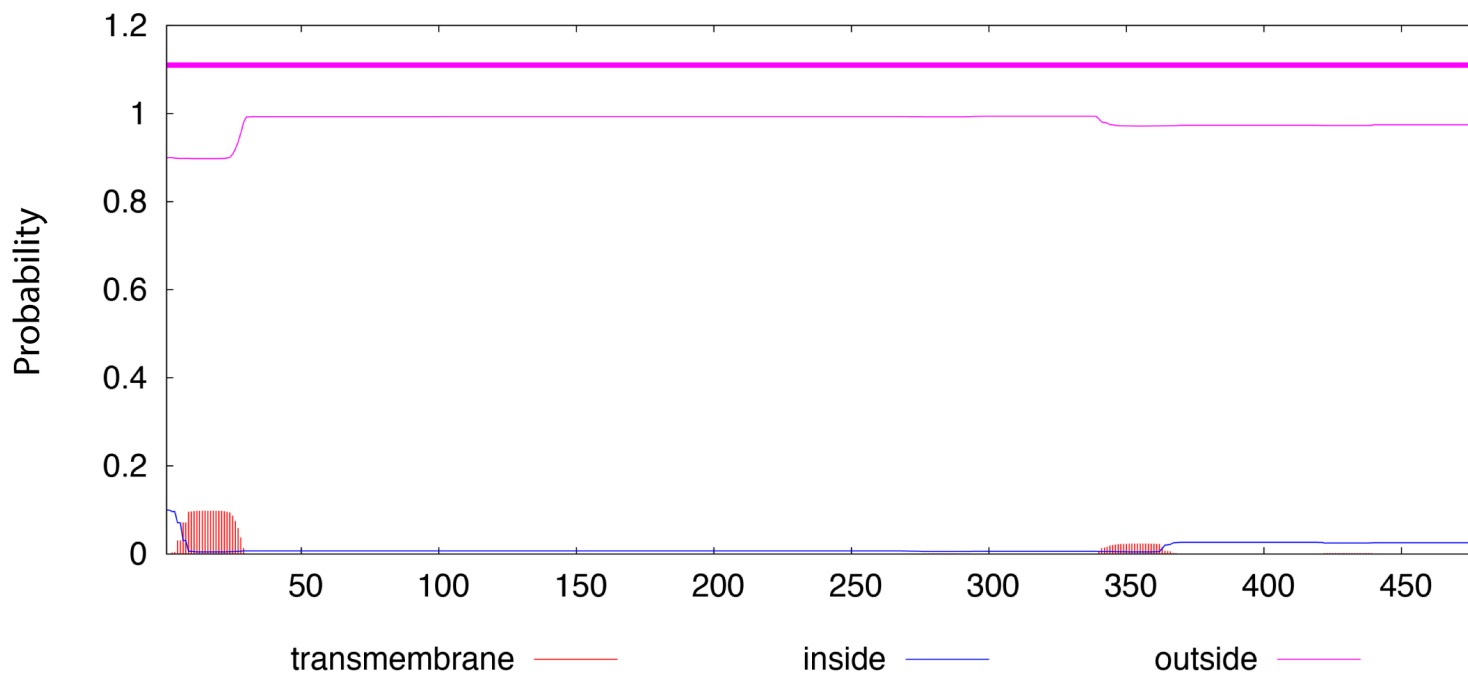**B**

### LipoP prediction of Tp0954 as a lipoprotein

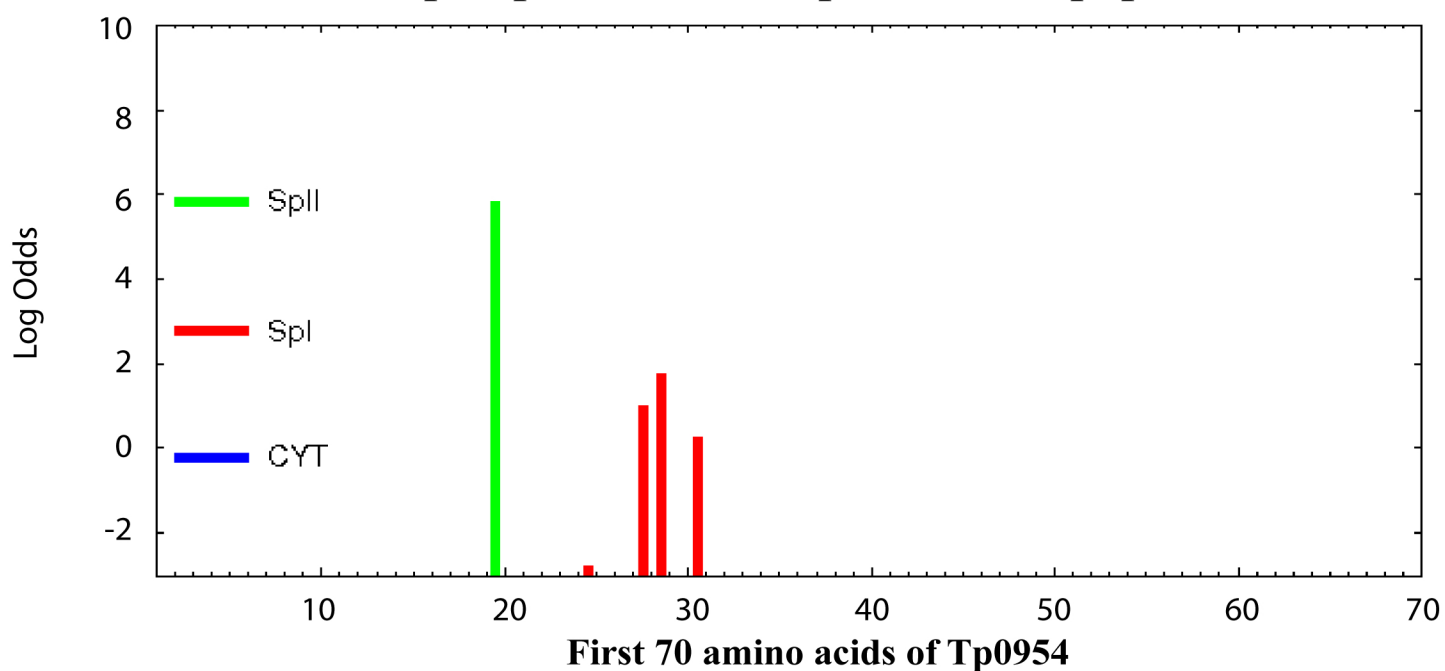**C**

### Tetratricopeptide repeat domains containing Tp0954 protein model

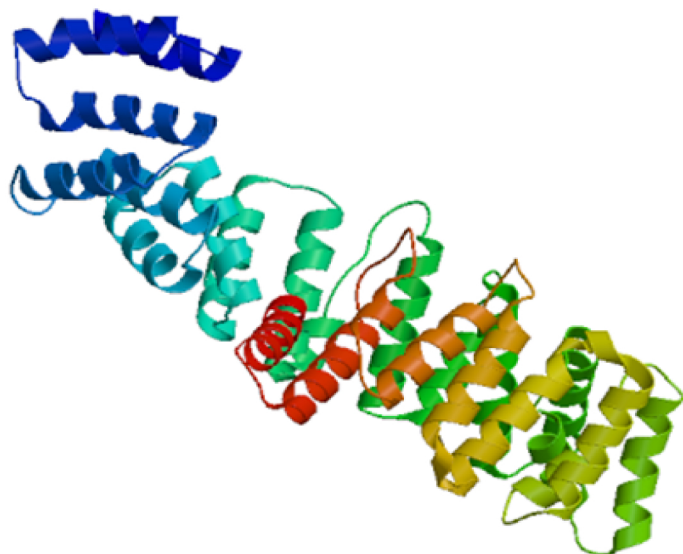

**Tp0954-** 45-451

**Template-** 5nnr.1.A

**N-terminal acetyltransferase-like protein**

**Seq. Identity-** 17.91

**Resolution-** 3.10A

**GMQE-** 0.54

**QMEAN-** -2.14
