# Supplementary material for: Identification and Functional Assessment of the First Placental Adhesin of Treponema pallidum That May Play Critical Role in Congenital Syphilis
Source: PubMed Central journal article supplement (PMC7779807; doi:10.3389/fmicb.2020.621654), 2020-12-21
Supplement: Image_2.pdf [file Image_2.pdf]

## A. Alignment of Tp0954 sequence from five different *T. pallidum* strain of different geographic origins

```
Nichols 1 MRYGTLFKVSVLLGALFVSCVSTGNSARESERAQLLKSENPNIRFAAQLSGLLEKQRWEEALQLFDLTPSPEHRAEKRIQYLYLSTLISAGKLTHAQELA
SS14 1 MRYGTLFKVSVLLGALFVSCVSTGNSARESERAQLLKSENPNIRFAAQLSGLLEKQRWEEALQLFDLTPSPEHRAEKRIQYLYLSTLISAGKLTHAQELA
Chicago 1 MRYGTLFKVSVLLGALFVSCVSTGNSARESERAQLLKSENPNIRFAAQLSGLLEKQRWEEALQLFDLTPSPEHRAEKRIQYLYLSTLISAGKLTHAQELA
Mexico A 1 MRYGTLFKVSVLLGALFVSCVSTGNSARESERAQLLKSENPNIRFAAQLSGLLEKQRWEEALQLFDLTPSPEHRAEKRIQYLYLSTLISAGKLTHAQELA
Amoy 1 MRYGTLFKVSVLLGALFVSCVSTGNSARESERAQLLKSENPNIRFAAQLSGLLEKQRWEEALQLFDLTPSPEHRAEKRIQYLYLSTLISAGKLTHAQELA

*****

Nichols EKLQDGP TASE TVQLWYAHAMIAQAKRDVRKKKQYVEKILAQDPHDLWALTERGYDFLSVNDYAQAVQAFSRALRVEPRAQDARVGLGKVVYLLQGMQE
SS14 EKLQDGP TASE TVQLWYAHAMIAQAKRDVRKKKQYVEKILAQDPHDLWALTERGYDFLSVNDYAQAVQAFSRALRVEPRAQDARVGLGKVVYLLQGMQE
Chicago EKLQDGP TASE TVQLWYAHAMIAQAKRDVRKKKQYVEKILAQDPHDLWALTERGYDFLSVNDYAQAVQAFSRALRVEPRAQDARVGLGKVVYLLQGMQE
Mexico A EKLQDGP TASE TVQLWYAHAMIAQAKRDVRKKKQYVEKILAQDPHDLWALTERGYDFLSVNDYAQAVQAFSRALRVEPRAQDARVGLGKVVYLLQGMQE
Amoy EKLQDGP TASE TVQLWYAHAMIAQAKRDVRKKKQYVEKILAQDPHDLWALTERGYDFLSVNDYAQAVQAFSRALRVEPRAQDARVGLGKVVYLLQGMQE

*****

Nichols AEAQYRQVLQDTPHEHERALAECA RVKAETNRVLEAIRDLE RVVQLDPHDPAYWTDLGT YLSQAGKKERAAAAFERAVALSADAYFAHIYLGGIYDELGRA
SS14 AEAQYRQVLQDTPHEHERALAECA RVKAETNRVLEAIRDLE RVVQLDPHDPAYWTDLGT YLSQAGKKERAAAAFERAVALSADAYFAHIYLGGIYDELGRA
Chicago AEAQYRQVLQDTPHEHERALAECA RVKAETNRVLEAIRDLE RVVQLDPHDPAYWTDLGT YLSQAGKKERAAAAFERAVALSADAYFAHIYLGGIYDELGRA
Mexico A AEAQYRQVLQDTPHEHERALAECA RVKAETNRVLEAIRDLE RVVQLDPHDPAYWTDLGT YLSQAGKKERAAAAFERAVALSADAYFAHIYLGGIYDELGRA
Amoy AEAQYRQVLQDTPHEHERALAECA RVKAETNRVLEAIRDLE RVVQLDPHDPAYWTDLGT YLSQAGKKERAAAAFERAVALSADAYFAHIYLGGIYDELGRA

*****

Nichols EKAIEHYQRAVQLYPKYHFSFESLGVLFWEQQRWEEAREAFATALTYAPTNI SYALMTALCLCQMGQAHK AQHFMR T FIRTVDRTREVEYFLCRLFVDL
SS14 EKAIEHYQRAVQLYPKYHFSFESLGVLFWEQQRWEEAREAFATALTYAPTNI SYALMTALCLCQMGQAHK AQHFMR T FIRTVDRTREVEYFLCRLFVDL
Chicago EKAIEHYQRAVQLYPKYHFSFESLGVLFWEQQRWEEAREAFATALTYAPTNI SYALMTALCLCQMGQAHK AQHFMR T FIRTVDRTREVEYFLCRLFVDL
Mexico A EKAIEHYQRAVQLYPKYHFSFESLGVLFWEQQRWEEAREAFATALTYAPTNI SYALMTALCLCQMGQAHK AQHFMR T FIRTVDRTREVEYFLCRLFVDL
Amoy EKAIEHYQRAVQLYPKYHFSFESLGVLFWEQQRWEEAREAFATALTYAPTNI SYALMTALCLCQMGQAHK AQHFMR T FIRTVDRTREVEYFLCRLFVDL

*****

Nichols SGEQDMASRISKIKSVQRI RY SFYLAF F YELGGRHLLAEKHYGEVESARAPSSFEHRLAVSALGRLRGRSSSLRTNP 478
SS14 SGEQDMASRISKIKSVQRI RY SFYLAF F YELGGRHLLAEKHYGEVESARAPSSFEHRLAVSALGRLRGRSSSLRTNP 478
Chicago SGEQDMASRISKIKSVQRI RY SFYLAF F YELGGRHLLAEKHYGEVESARAPSSFEHRLAVSALGRLRGRSSSLRTNP 478
Mexico A SGEQDMASRISKIKSVQRI RY SFYLAF F YELGGRHLLAEKHYGEVESARAPSSFEHRLAVSALGRLRGRSSSLRTNP 478
Amoy SGEQDMASRISKIKSVQRI RY SFYLAF F YELGGRHLLAEKHYGEVESARAPSSFEHRLAVSALGRLRGRSSSLRTNP 478
*****
```

## B. Alignment of Tp0954 of Nichols Houston and *T. paraluisuniculi* homolog

```
Houston MRYGTLFKVSVLLGALFVSCVSTGNSARESERAQLLKSENPNIRFAAQLSGLLEKQRWEEALQLFDLTPSPEHRAEKRIQYLYLSTLISAGKLTHAQELA
Paraluisc. MRYGTLFKVSVLLGALFVSCVSTGNSARESERAQLLKSENPNIRFAAQLSGLLEKQRWEEALQLFDLTPSPEHRAEKRIQYLYLSTLISAGKLTHAQELA

*****

Houston EKLQDGP TASE TVQLWYAHAMIAQAKRDVRKKKQYVEKILAQDPHDLWALTERGYDFLSVNDYAQAVQAFSRALRVEPRAQDARVGLGKVVYLLQGMQE
Paraluisc. EKLQDGP TASE TVQLWYAHAMIAQAKRDVRKKKQYVEKILAQDPHDLWALTERGYDFLSVNDYAQAVQAFSRALRVEPRAQDARVGLGKVVYLLQGMQE

*****

Houston AEAQYRQVLQDTPHEHERALAECA RVKAETNRVLEAIRDLE RVVQLDPHDPAYWTDLGT YLSQAGKKERAAAAFERAVALSADAYFAHIYLGGIYDELGRA
Paraluisc. AEAQYRQVLQDTPHEHERALAECA RVKAETNRVLEAIRDLE RVVQLDPHDPAYWTDLGT YLSQAGKKERAAAAFERAVALSADAYFAHIYLGGIYDELGRA

*****

Houston EKAIEHYQRAVQLYPKYHFSFESLGVLFWEQQRWEEAREAFATALTYAPTNI SYALMTALCLCQMGQAHK AQHFMR T FIRTVDRTREVEYFLCRLFVDL
Paraluisc. EKAIEHYQRAVQLYPKYHFSFESLGVLFWEQQRWEEAREAFATALTYAPTNI SYALMTALCLCQMGQAHK AQHFMR T FIRTVDRTREVEYFLCRLFVDL

*****

Houston SGEQDMASRISKIKSVQRI RY SFYLAF F YELGGRHLLAEKHYGEVESARAPSSFEHRLAVSALGRLRGRSSSLRTNP 478
Paraluisc. SGEQDMASRISKIKSVQRI RY SFYLAF F YELGGRHLLAEKHYGEVESARAPSSFEHRLAVSALGRLRRSSSLRTNP 478
*****
```
