# Supplementary material for: Identification and Functional Assessment of the First Placental Adhesin of Treponema pallidum That May Play Critical Role in Congenital Syphilis
Source: PubMed Central journal article supplement (PMC7779807; doi:10.3389/fmicb.2020.621654), 2020-12-21
Supplement: Image_3.pdf [file Image_3.pdf]

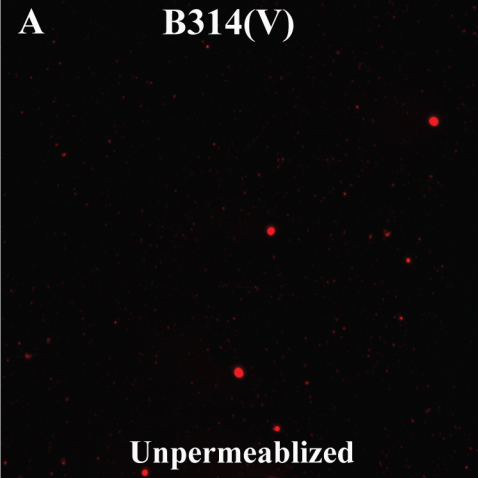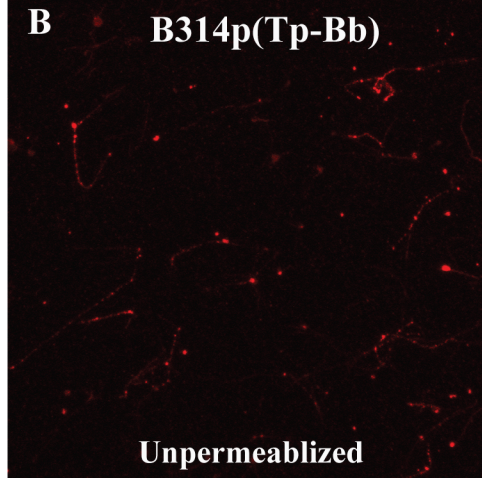

**Anti-Tp954N**

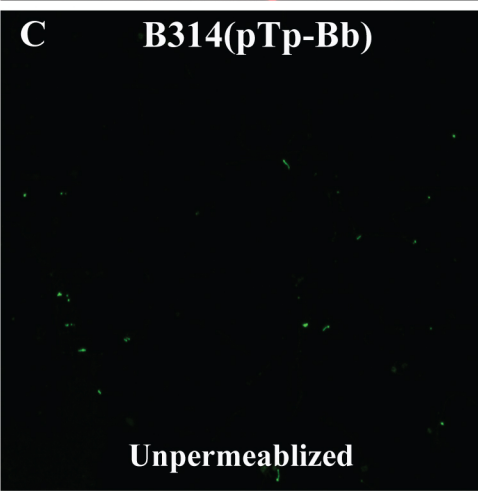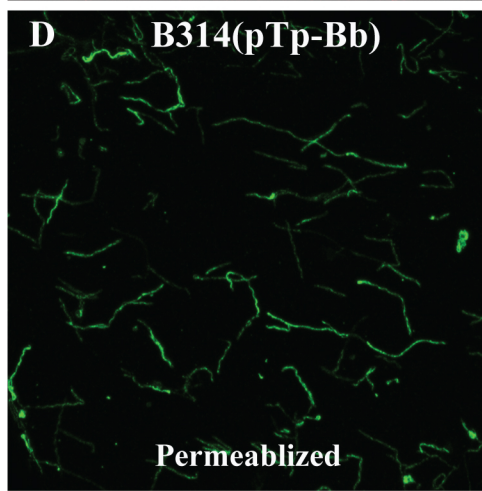

**Anti-FlaA**
