# Supplementary material for: Identification and Functional Assessment of the First Placental Adhesin of Treponema pallidum That May Play Critical Role in Congenital Syphilis
Source: PubMed Central journal article supplement (PMC7779807; doi:10.3389/fmicb.2020.621654), 2020-12-21

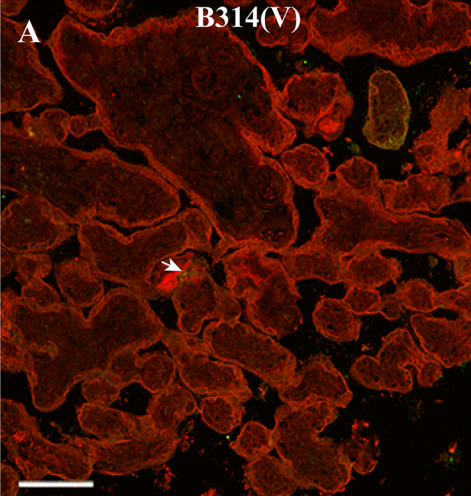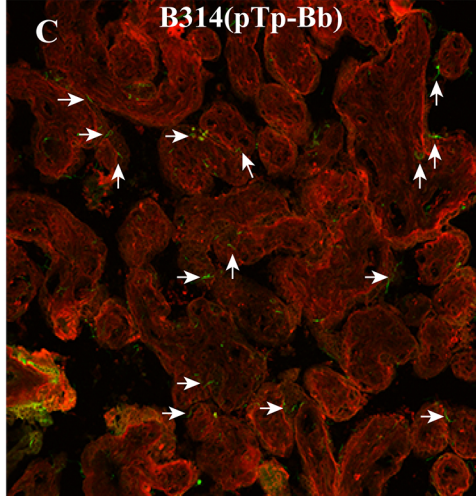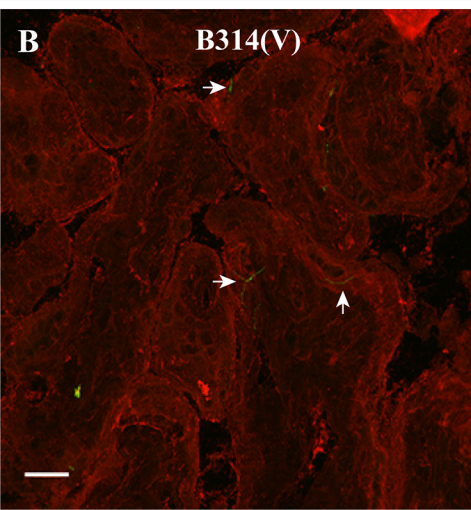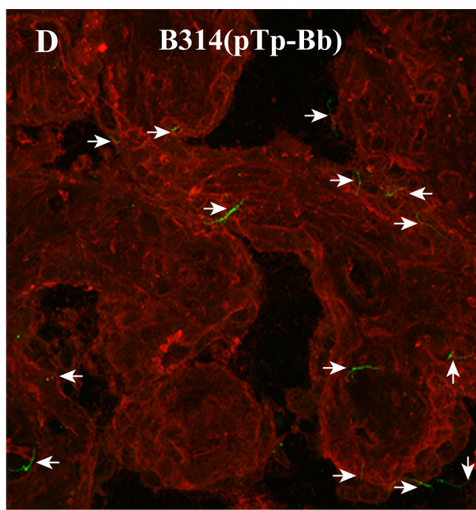

Supplement: Image_4.pdf [file Image_4.pdf]
