# Supplementary material for: Identification and Functional Assessment of the First Placental Adhesin of Treponema pallidum That May Play Critical Role in Congenital Syphilis
Source: PubMed Central journal article supplement (PMC7779807; doi:10.3389/fmicb.2020.621654), 2020-12-21
Supplement: Image_5.pdf [file Image_5.pdf]

**Anti-Tp954N  
unpermeablized**

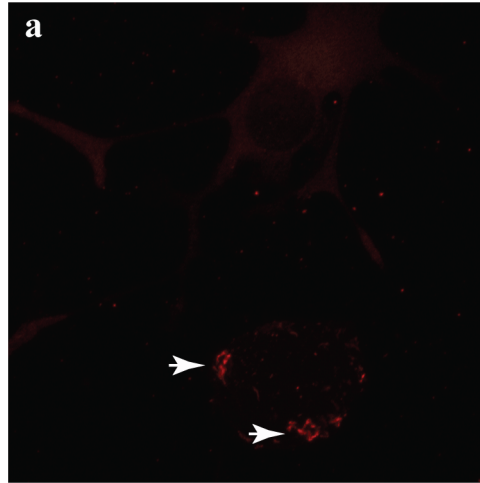

**Anti-FlaA  
unpermeablized**

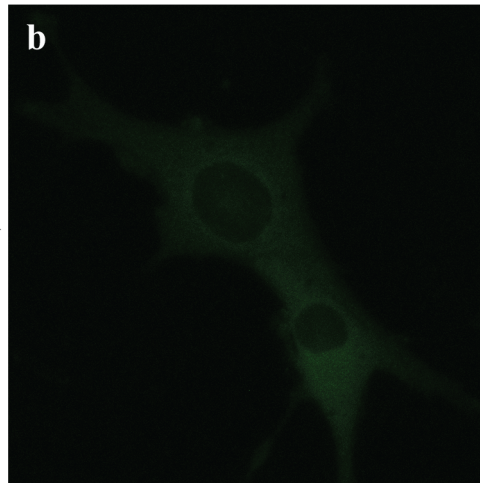

**Anti-FlaA  
permeablized**

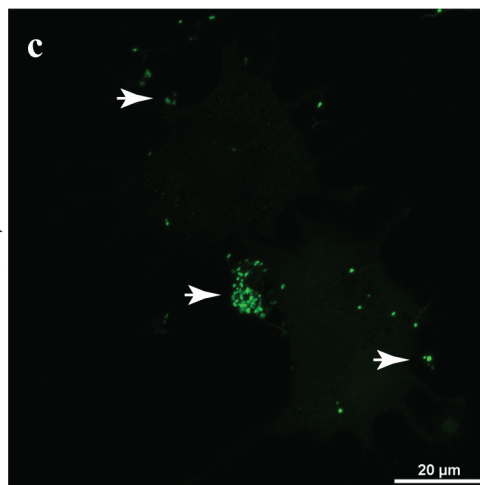

***T. pallidum* SS14 strain**
